# Supplementary material for: Controlling mechanical properties of bio-inspired hydrogels by modulating nano-scale, inter-polymeric junctions
Source: publisher site journal article supplement (doi:10.3762/bjnano.5.101), 2014-06-23
Supplement: Additional file 1 [file 2190-4286-5-101-S1.pdf]

**Supporting Information**

**for**

**Controlling mechanical properties of bio-inspired hydrogels by modulating nano-scale, inter-polymeric junctions**

Seonki Hong<sup>1</sup>, Hyukjin Lee<sup>2</sup> and Haeshin Lee\*<sup>1</sup>

Address: <sup>1</sup>Department of Chemistry, Center for Nature-inspired Technology in KI NanoCentury, Korea Advanced Institute of Science and Technology (KAIST), 291, University Rd, Daejeon 305-701, South Korea and <sup>2</sup>College of Pharmacy, Graduate School of Pharmaceutical Sciences, Ewha Womans University, Seoul 120-750, South Korea

Email: Haeshin Lee – [haeshin@kaist.ac.kr](mailto:haeshin@kaist.ac.kr)

\* Corresponding author

**Further experimental data**

## <sup>1</sup>H NMR data of 6Arm-PEG-NH-catechol and 6Arm-PEG-catechol

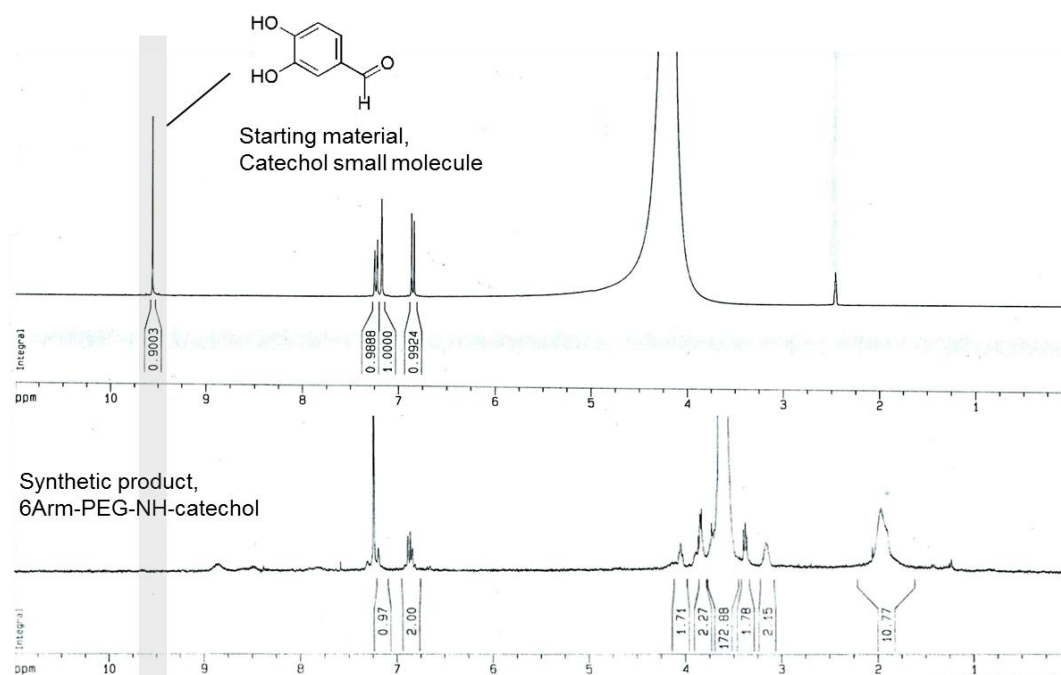

**Figure S1.** Purity confirmation of synthesized 6Arm-PEG-NH-catechol polymer analyzed by <sup>1</sup>H NMR. Peaks at 9–10 ppm indicating aldehyde in starting material (up), were successfully disappeared after bound to PEGs (down).

### 6Arm-PEG-NH-catechol <sup>1</sup>H NMR (300 MHz, CDCl<sub>3</sub>, δ)

7.19 (s, 1H, C<sub>6</sub>H<sub>2</sub>H(OH)<sub>2</sub>-), 6.81-6.88 (m, 2H, C<sub>6</sub>HH<sub>2</sub>-(OH)<sub>2</sub>-), 4.09-4.05 (m, 2H, -NH-CH<sub>2</sub>-C<sub>6</sub>H<sub>3</sub>(OH)<sub>2</sub>-), 3.95-3.59 (m, PEO), 3.40-3.36 (t, 2H, PEO-CH<sub>2</sub>-NH-)

### 3,4-dihydroxybenzaldehyde (DHBA, 300 MHz, DMSO-*d*<sub>6</sub>, δ)

9.56 (s, 1H, CHO), 7.26-7.22 (dd, 1H, C<sub>6</sub>H<sub>2</sub>H(OH)<sub>2</sub>-CHO), 7.18 (d, 1H, C<sub>6</sub>H<sub>2</sub>H(OH)<sub>2</sub>-CHO), 6.87-6.84 (d, 1H, C<sub>6</sub>H<sub>2</sub>H(OH)<sub>2</sub>-CHO)

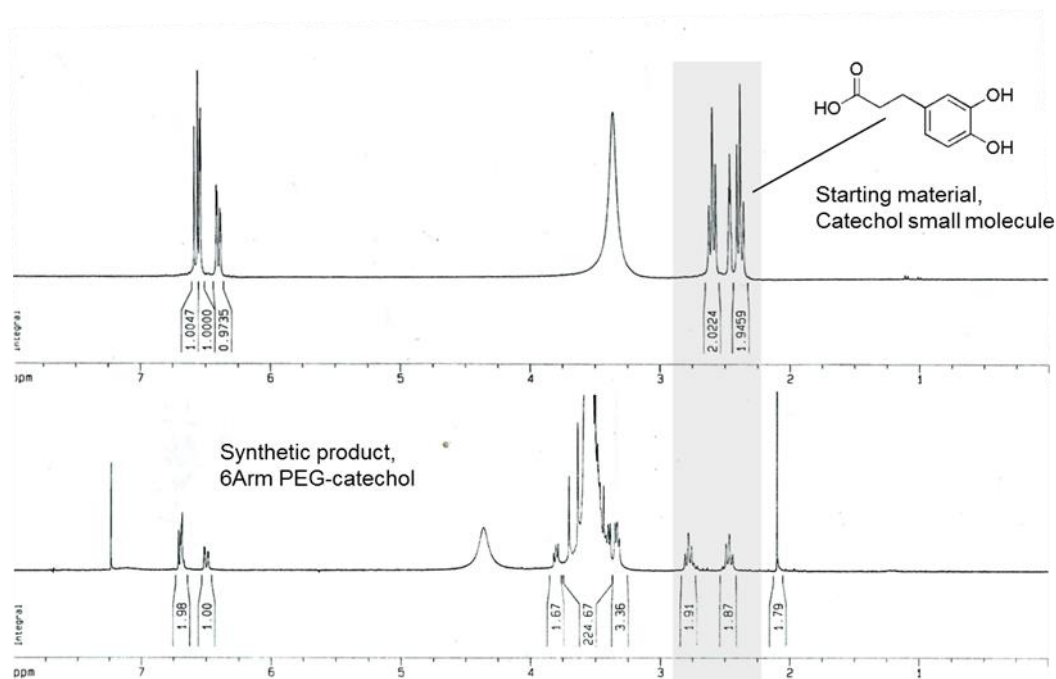

**Figure S2.** Purity confirmation of synthesized 6Arm-PEG-catechol polymer analyzed by <sup>1</sup>H NMR. Peaks at 2–3 ppm, -CH<sub>2</sub>-CH<sub>2</sub>- in starting material (up), were successfully shifted with 0.2 ppm after bound to PEGs (down).

### 6Arm-PEG-catechol <sup>1</sup>H NMR (300 MHz, CDCl<sub>3</sub>, δ)

6.71-6.69 (m, 2H, C<sub>6</sub>H<sub>2</sub>H(OH)<sub>2</sub>-), 6.52-6.49 (dd, 1H, C<sub>6</sub>H<sub>2</sub>H(OH)<sub>2</sub>-), 3.79-3.33 (m, PEO), 2.81-2.76 (t, 2H, C<sub>6</sub>H<sub>3</sub>(OH)<sub>2</sub>-CH<sub>2</sub>-), 2.49-2.44 (t, 2H, CH<sub>2</sub>-C(O)NH-)

### 3,4-dihydroxyhydrocinnamic acid (DHCA, 300 MHz, DMSO-*d*<sub>6</sub>, δ)

6.59-6.56 (d, 1H, C<sub>6</sub>H<sub>2</sub>H(OH)<sub>2</sub>-), 6.55-6.54 (d, 1H, C<sub>6</sub>H<sub>2</sub>H(OH)<sub>2</sub>-), 6.42-6.39 (dd, 1H, C<sub>6</sub>H<sub>2</sub>H(OH)<sub>2</sub>-), 2.62-2.57 (t, 2H, C<sub>6</sub>H<sub>3</sub>(OH)<sub>2</sub>-CH<sub>2</sub>-), 2.41-2.36 (t, 2H, -CH<sub>2</sub>-COOH)

### GPC data of mPEG-NH-catechol and mPEG-catechol

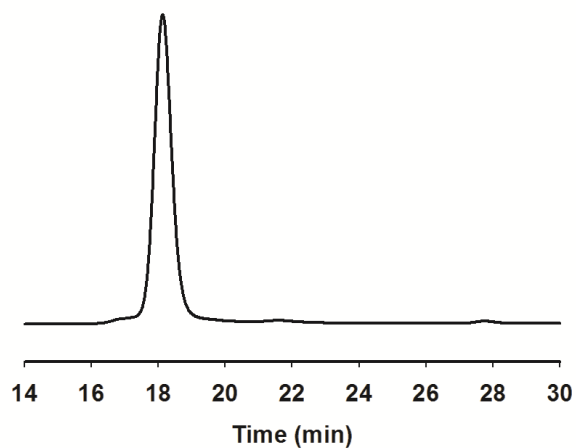

**Figure S3.** GPC data of synthesized mPEG-NH-catechol. There were no peaks after 18 min, elution time of synthesized mPEG-NH-catechol product.

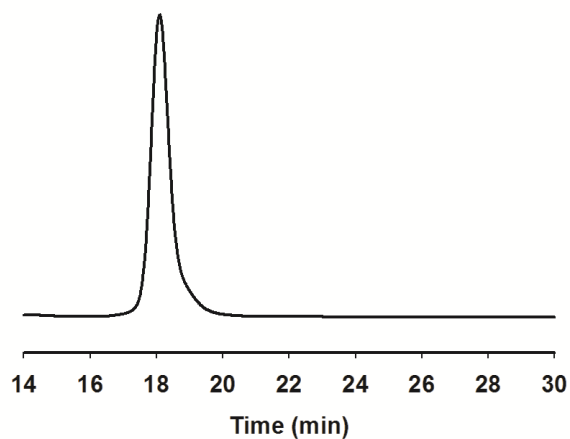

**Figure S4.** GPC data of synthesized mPEG-catechol. There were no peaks after 18 min, elution time of synthesized mPEG-catechol product.

## Calibration curve of our GPC system

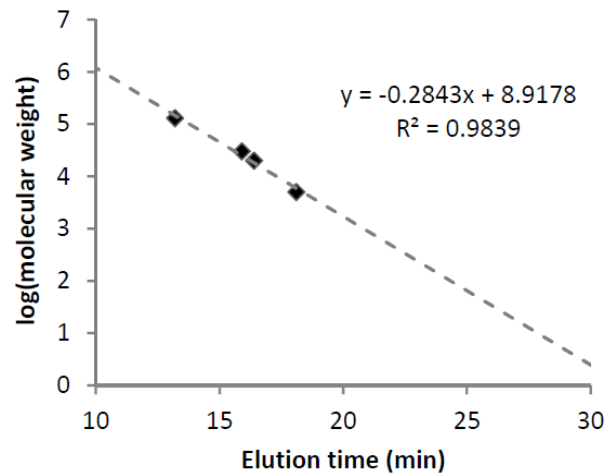

**Figure S5.** Calibration curve of GPC system. Each point means 130 kDa, 30 kDa, 20 kDa, and 5 kDa molecular weight Hyaluronic acid and PEGs. 30 min corresponds to the molecular weight under 100 Da. This means above GPC data of mPEG-NH-catechol and mPEG-catechol have no impurities, molecular weight under 5 kDa to 100 Da.

## Quinone tanning reactions of catecholic linear PEG derivatives.

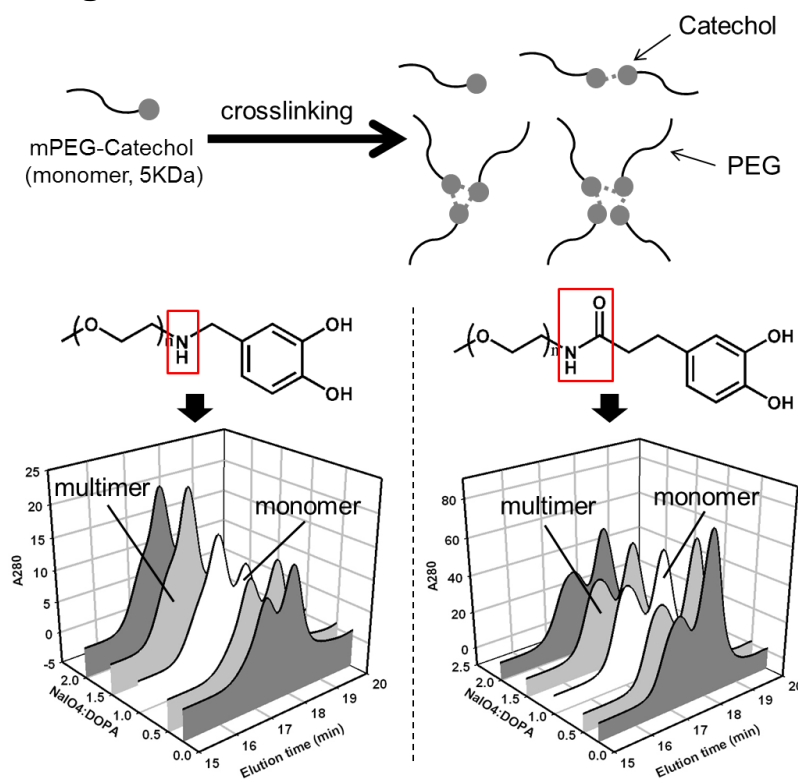

**Figure S6.** A schematic description of quinone tanning (i.e. crosslinking) of catecholic PEGs (Chemical structure: mPEG-NH-catechol (left) and mPEG-catechol (right)) Quinone tanned products of mPEG-NH-catechol and mPEG-catechol as a function of a stoichiometric ratio of NaIO<sub>4</sub> : catechol (0.25 : 1 – 2 : 1) was analyzed by gel permeation chromatography.
